# Supplementary material for: Untargeted Metabolomics in Forensic Toxicology: A New Approach for the Detection of Fentanyl Intake in Urine Samples
Source: MDPI journal article supplement (doi:10.3390/molecules26164990), 2021-08-18
Supplement: s1 [file s1]

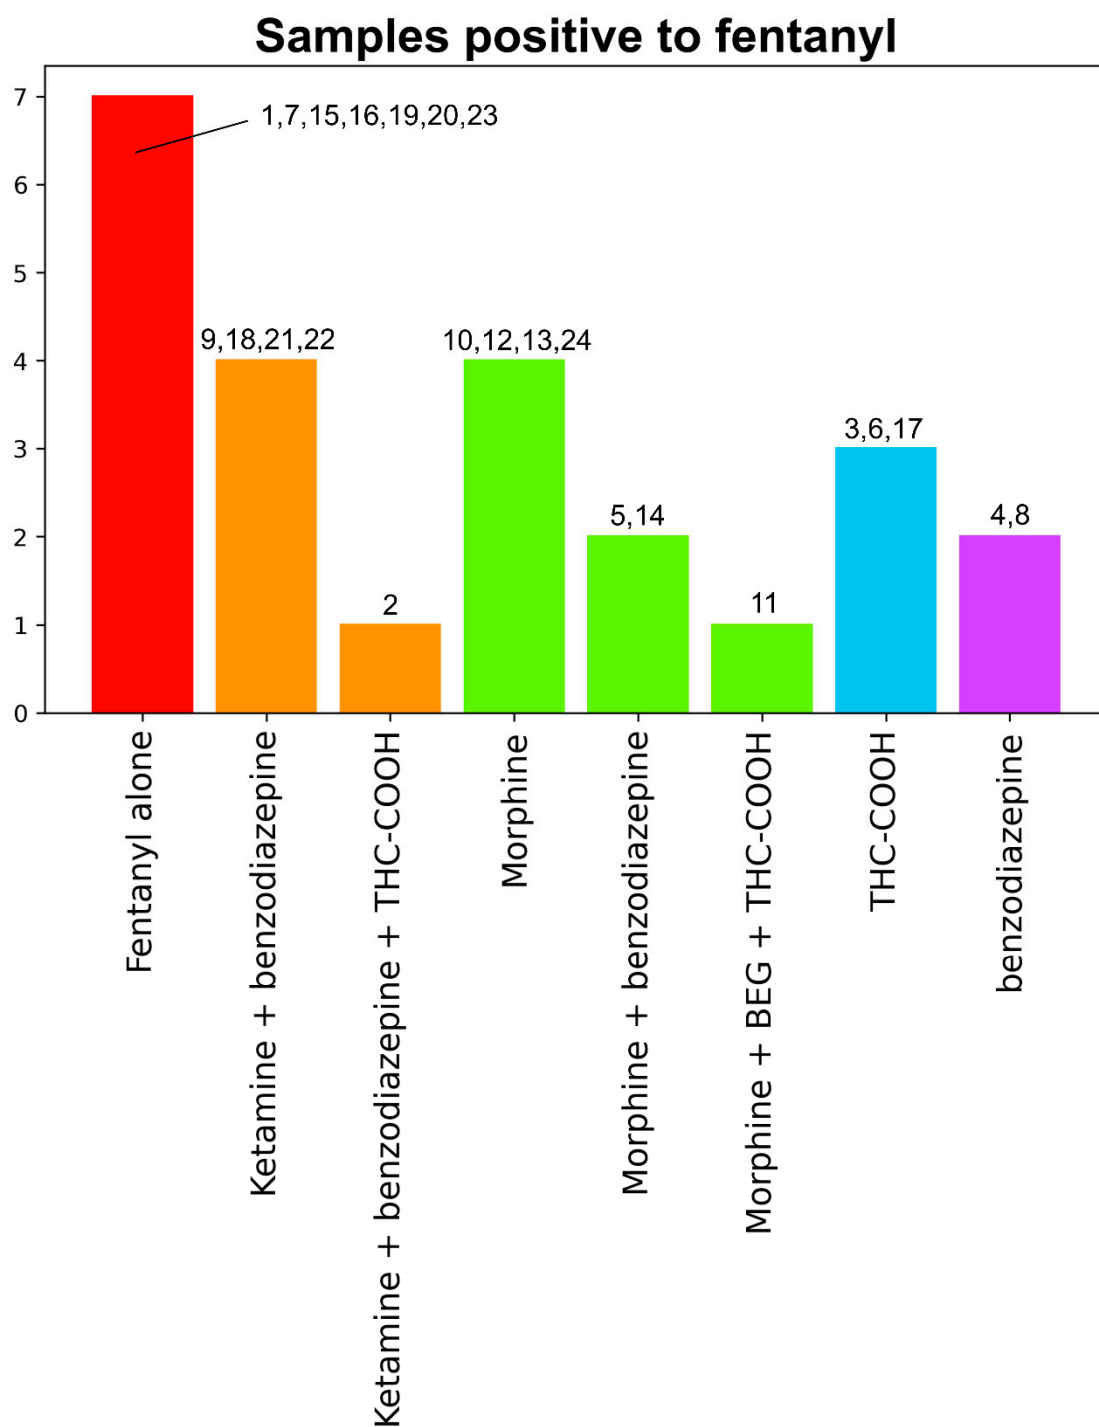

**Figure S1.** Bar plot reporting the samples positive to fentanyl alone and the ones involved in poly-consumptions. The numbers reported on the bars correspond to the samples' IDs.

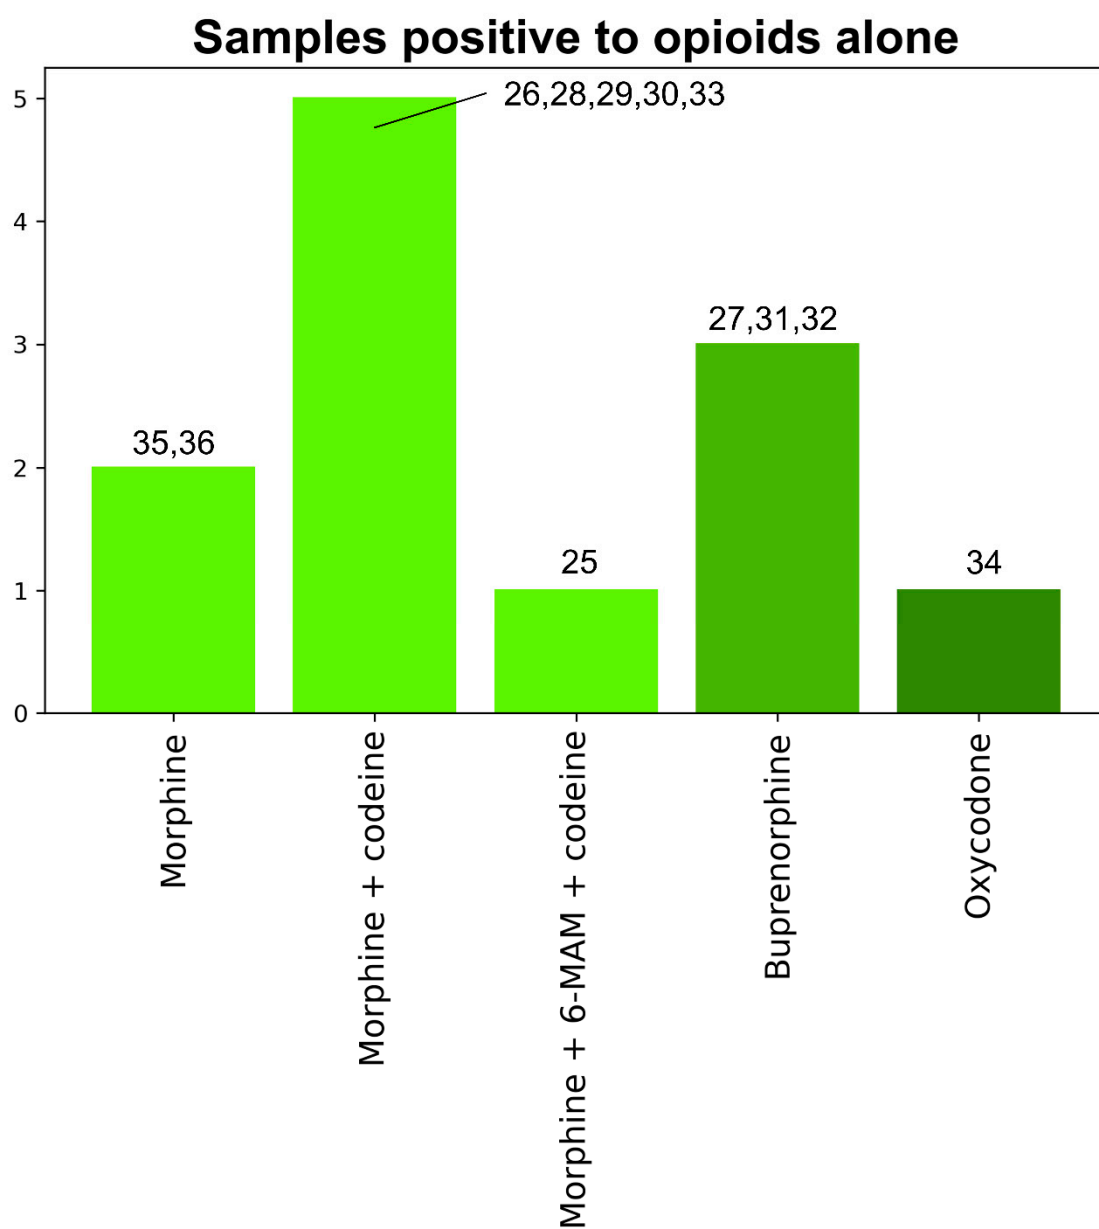

**Figure S2.** Bar plot reporting the distribution of the samples positive to traditional opioids. The numbers reported on the bars correspond to the samples' IDs.

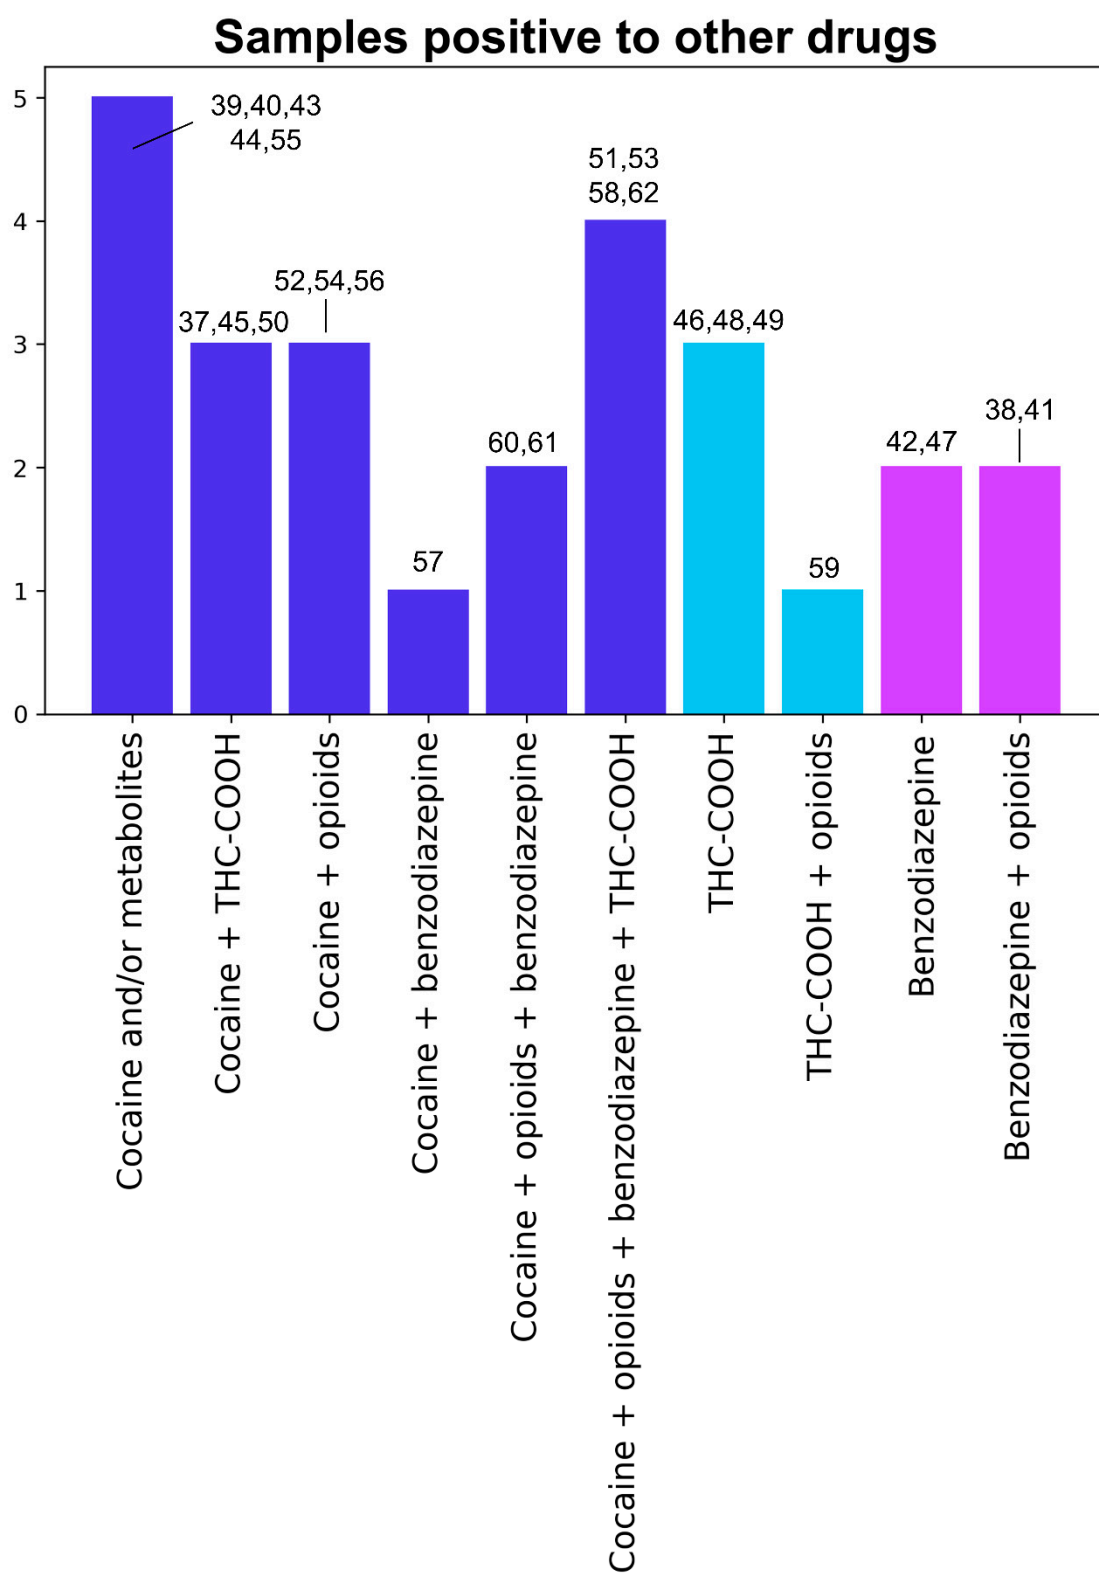

**Figure S3.** Bar plot reporting the distribution of the samples positive to traditional drugs. The numbers reported on the bars correspond to the samples' IDs.

### Verification of the technical replicates reproducibility

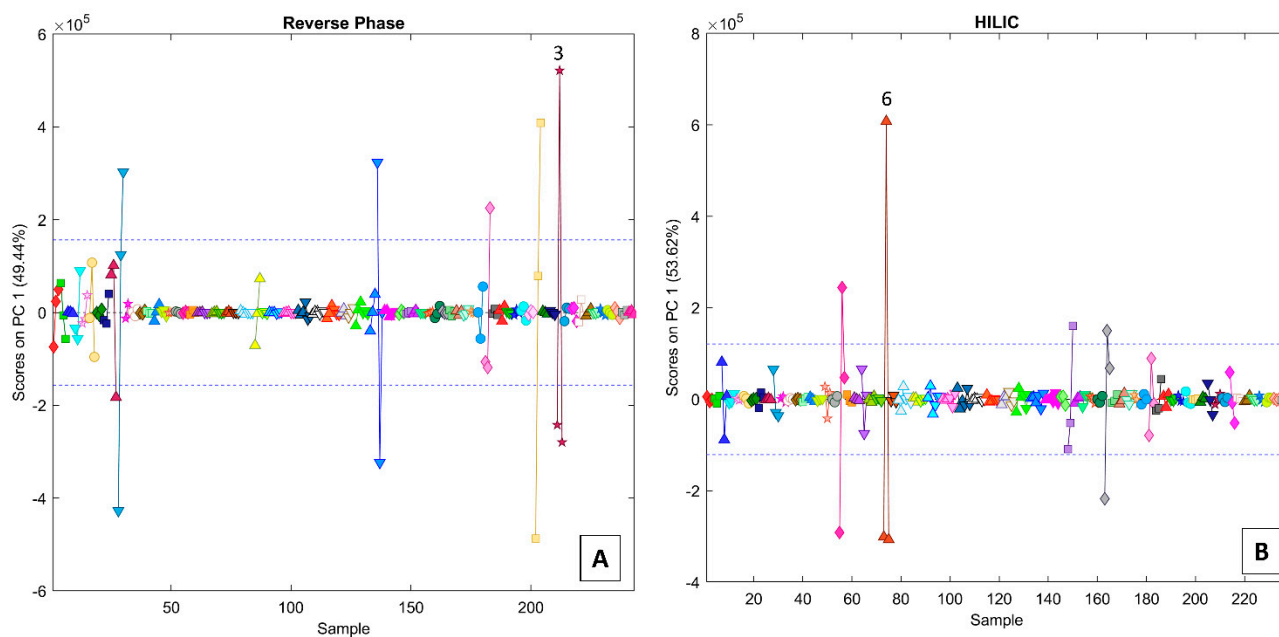

**Figure S4.** PCA models calculated using the class-centering pre-treatment to investigate the reproducibility of the technical replicates. Each sample is differently colored and the technical replicates are linked by a line. (A) RP experiments and (B) HILIC experiments.

### Verification of the batch effect correction

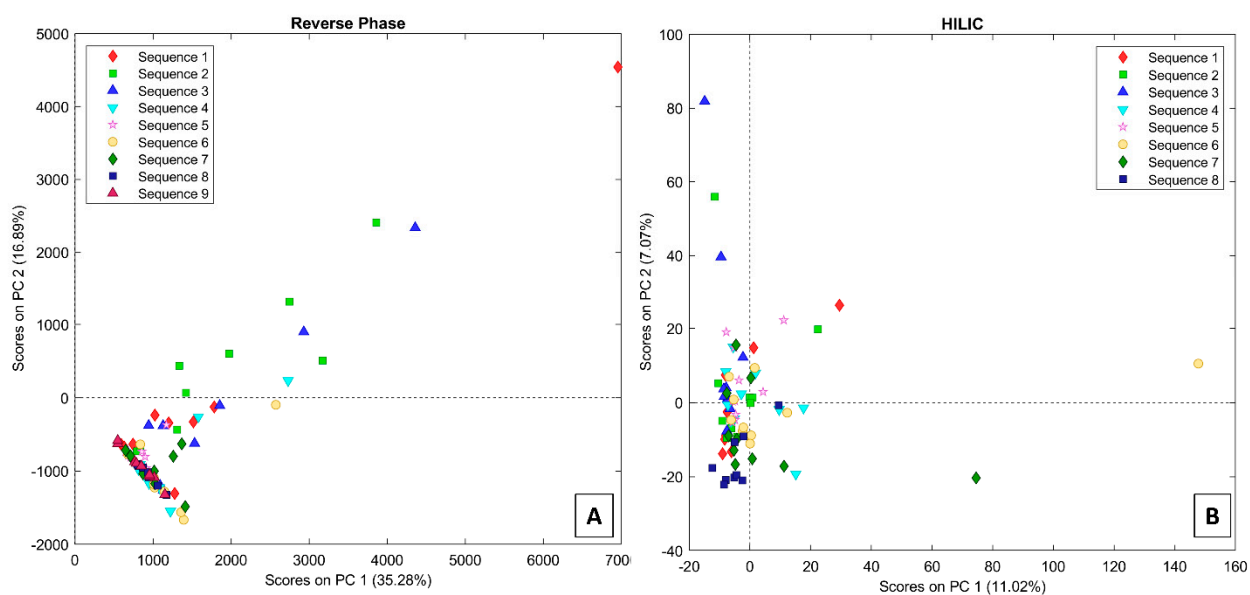

**Figure S5.** PCA model calculated on the Pareto scaled RP dataset (A) and of the autoscaled HILIC dataset (B). The data-points are coloured on the basis of the analytical sequence.

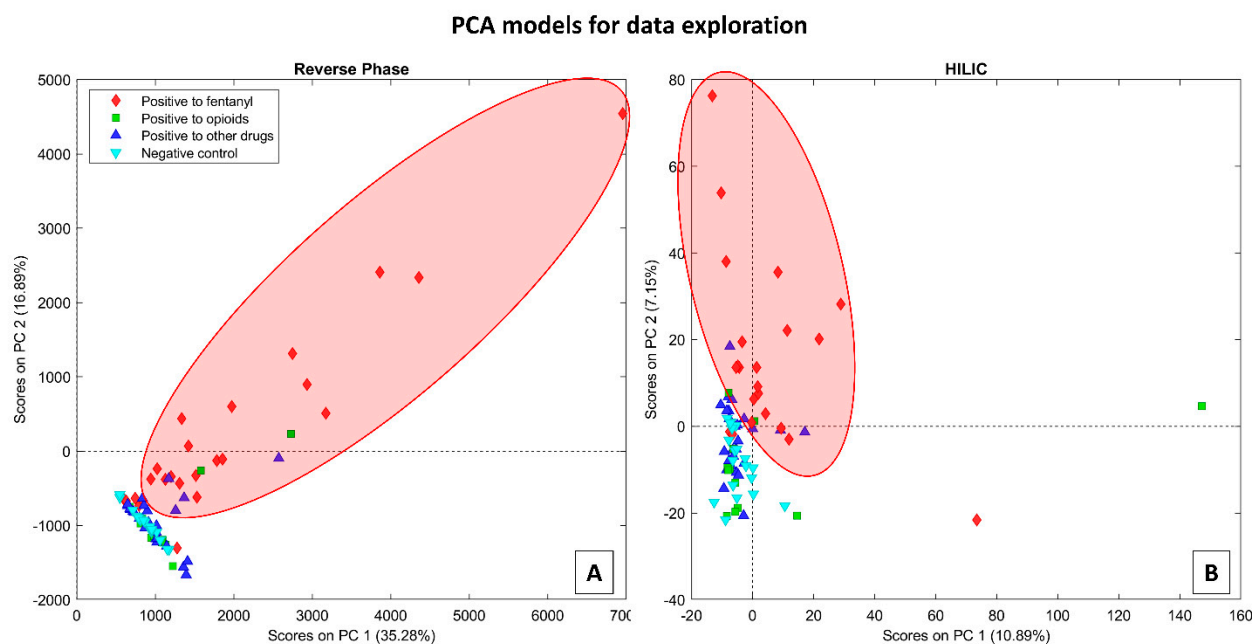

**Figure S6.** PCA model calculated on the Pareto scaled RP dataset (A) and of the autoscaled HILIC dataset (B). The data-points are coloured on the basis of the four groups identified (see Materials and Methods).

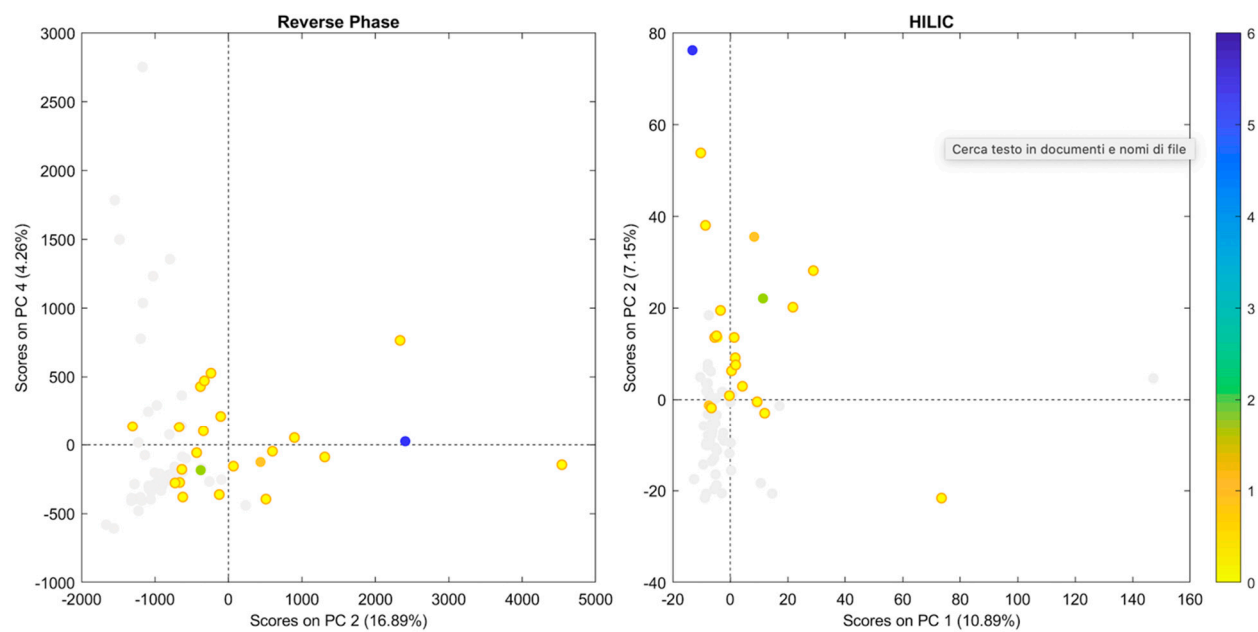

**Figure S7.** Investigation of a trend related to the fentanyl urinary dosage in the RP (A) and HILIC (B) dataset, respectively.

### RP dataset PCA – Loadings plot

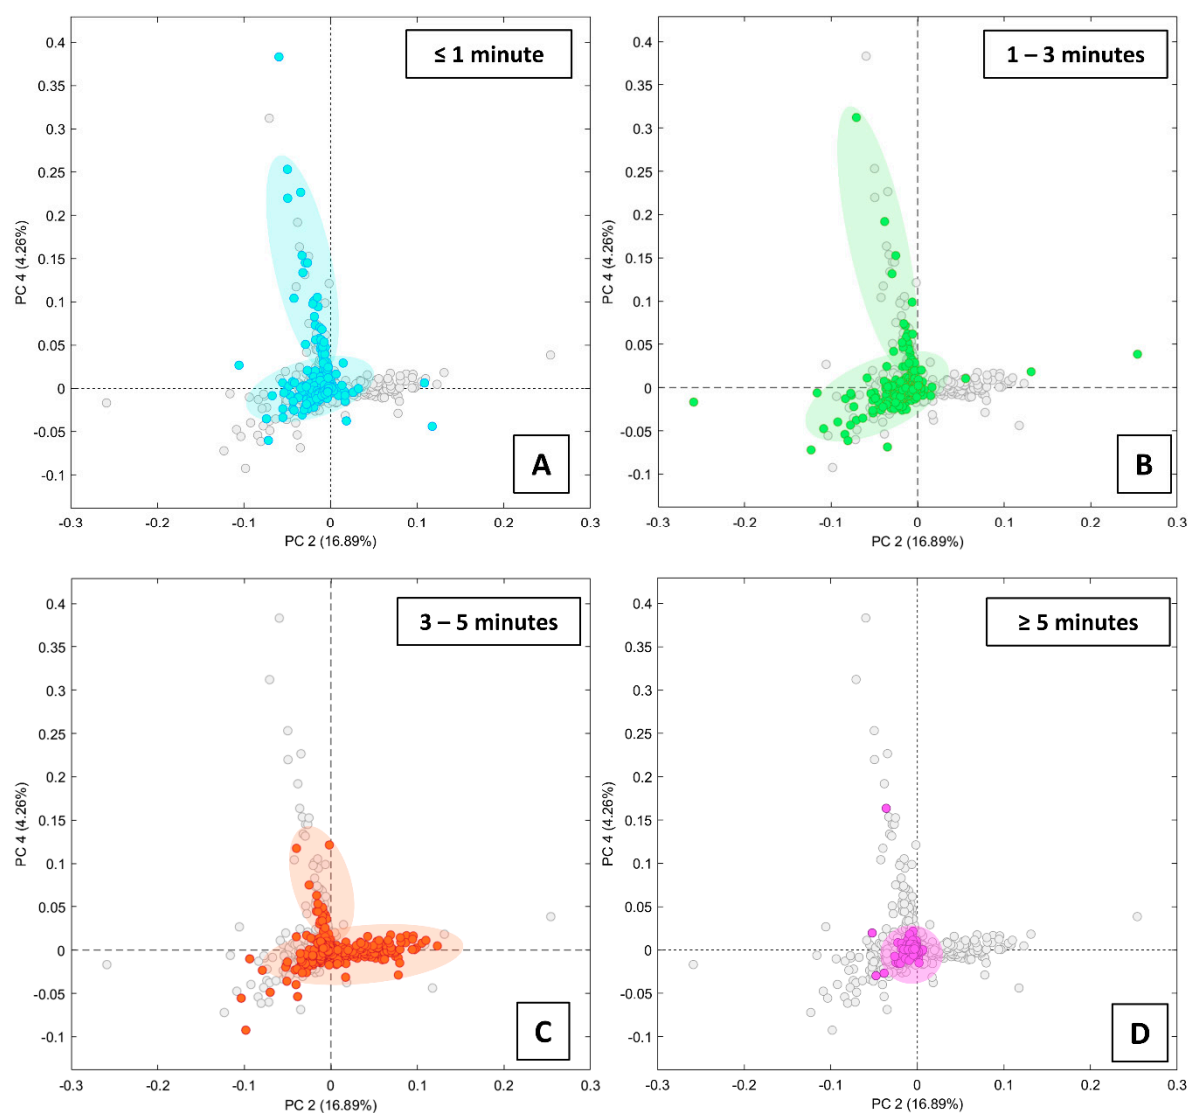

**Figure S8.** PC2 vs PC4 loadings plot of the PCA model built with the RP dataset. The loadings are coloured on the basis of the retention time: (A) lower than (or equal to) 1 minute, (B) between 1 minute and 3 minutes, (C) between 3 minutes and 5 minutes, and (D) higher than 5 minutes.



**Table S1.** Fentanyl and norfentanyl dosage. The method's limit of detection is equal to 0.2 ng/mL

| #ID | Fentanyl<br>(ng/mL) | Norfentanyl<br>(ng/mL) |
|-----|---------------------|------------------------|
| 1   | 120                 | 220                    |
| 2   | 100                 | 210                    |
| 3   | 70                  | 64                     |
| 4   | 25                  | 6.0                    |
| 5   | 25                  | 68                     |
| 6   | 21                  | 59                     |
| 7   | 14                  | 6.9                    |
| 8   | 14                  | 44                     |
| 9   | 14                  | 15                     |
| 10  | 12                  | 3.7                    |
| 11  | 4.6                 | 2.3                    |
| 12  | 4.2                 | 1.9                    |
| 13  | 3.0                 | 2.0                    |
| 14  | 2.3                 | 1.4                    |
| 15  | 2.3                 | 9.7                    |
| 16  | 2.1                 | 1.9                    |
| 17  | 1.9                 | 20                     |
| 18  | 1.0                 | 1.1                    |
| 19  | 0.9                 | 3.1                    |
| 20  | 0.9                 | 0.5                    |
| 21  | 0.9                 | 10                     |
| 22  | 0.7                 | 0.5                    |
| 23  | 0.4                 | 1.2                    |
| 24  | 0.2                 | <LOD                   |
